# Supplementary material for: Bis-(salicylaldehyde-benzhydrylimino)nickel complexes with different electron groups: crystal structure and their catalytic properties toward (co)polymerization of norbornene and 1-hexene
Source: Royal Society of Chemistry journal article supplement (doi:10.1039/c8ra06561f), 2018-01-01
Supplement: c8ra06561f1.pdf [file c8ra06561f1.pdf]

# **Bis-(salicylaldehyde-benzhydrylimino)Nickel Complexes with Different Electron Groups: Crystal Structure and Their Catalytic Properties toward (Co)polymerization of Norbornene and 1-hexene**

Xiaohui He, <sup>\*a</sup> Guangshui Tu, <sup>a</sup> Feng Zhang, <sup>a</sup> Shengmei Huang, <sup>a,c</sup> Changwen  
Cheng, <sup>a</sup> Chuanyi Zhu, <sup>a</sup> Yapeng Duan, <sup>a</sup> Suli Wang, <sup>a</sup> and Defu Chen<sup>b</sup>

<sup>a</sup>School of Materials Science and Engineering, Nanchang University, 999 Xuefu  
Avenue, Nanchang 330031, China

<sup>b</sup>School of Civil Engineering and Architecture, Nanchang University, 999 Xuefu  
Avenue, Nanchang 330031, China

<sup>c</sup>School of Materials Science and Engineering, Nanchang Hangkong University,  
Nanchang 330063, China

Correspondence to: X. H. He (E-mail: [hexiaohui@ncu.edu.cn](mailto:hexiaohui@ncu.edu.cn))

Crystallographic data for the structural analyses have been deposited with the Cambridge Crystallographic Data Center, CCDC Nos. 1587113 for Ni1, 1575909 for Ni2, 1817084 for Ni3, 1851039 for Ni4, 1843971 for Ni5, 1575905 for Ni6, 1830324 for Ni7, 1843964 for Ni8. Copies of this information may be obtained free of charge from The Director, CCDC, 12 Union Road, Cambridge CB2 1EZ, UK (fax: +44 1223 336033; e mail: [deposit@ccdc.cam.ac.uk](mailto:deposit@ccdc.cam.ac.uk). <http://www.ccdc.cam.ac.uk>).

## **Synthesis of ligands (L1-L8) and nickel complexes (Ni1-Ni8)**

The synthesis of the (5-CH<sub>3</sub>)C<sub>6</sub>H<sub>3</sub>(OH)CHNCH(C<sub>6</sub>H<sub>5</sub>)<sub>2</sub> (L2) is similar to L1. L2 was got as yellow crystals. yield:1.89g(62.8%). <sup>1</sup>H NMR (CDCl<sub>3</sub>, δ, ppm): 16.48 (s, 1H, OH); 7.54 (s, 1H, -C=N-H); 7.24-7.39(m, 10H, 2C<sub>6</sub>H<sub>5</sub>); 6.78-7.24 (m, 3H, C<sub>6</sub>H<sub>3</sub>); 5.99 (s, 1H, C<sub>13</sub>H<sub>12</sub>); 2.39(s, 3H, CH<sub>3</sub>). FT-IR (KBr): 3044.12(w), 2982.61(w), 2805.91(w),

1918.79(w),1664.33(vs,  $\nu_{C=N}$ ),1527.91(s),1464.86 (m),1416.12(w),1302.81(s).

The synthesis of the (5-OCH<sub>3</sub>)C<sub>6</sub>H<sub>3</sub>(OH) CHNCH(C<sub>6</sub>H<sub>5</sub>)<sub>2</sub> (L3) is similar to L1. L3 was got as yellow crystals. yield:1.63g(51.4%).<sup>1</sup>H NMR (CDCl<sub>3</sub>,  $\delta$ , ppm): 12.95(s, 1H, OH); 9.42(s, 1H, -C=N-H);7.11-7.40(m, 10H, 2C<sub>6</sub>H<sub>5</sub>); 6.95-7.11 (m, 3H, C<sub>6</sub>H<sub>3</sub>); 5.62 (s, 1H, C<sub>13</sub>H<sub>12</sub>); 3.75(s, 3H, OCH<sub>3</sub>). FT-IR (KBr): 3009.84(w), 2969.70(w), 2878.04(w), 1663.56(vs,  $\nu_{C=N}$ ), 1528.60(s), 1468.78 (m),1417.78(w),1343.66(s).

The synthesis of the (5-Br)C<sub>6</sub>H<sub>3</sub>(OH) CHNCH(C<sub>6</sub>H<sub>5</sub>)<sub>2</sub> (L4) is similar to L1. L4 was got as yellow crystals. yield:2.31g(63.3%).<sup>1</sup>H NMR (CDCl<sub>3</sub>,  $\delta$ , ppm): 13.54(s, 1H, OH); 9.37(s, 1H, -C=N-H);7.17-7.40(m, 10H, 2C<sub>6</sub>H<sub>5</sub>); 6.95-7.17 (m, 3H, C<sub>6</sub>H<sub>3</sub>); 5.65 (s,1H,C<sub>13</sub>H<sub>12</sub>).FT-

IR(KBr):2926.85(w),2860.49(w),2755.04(w),1909.97(w),1647.73(vs,  $\nu_{C=N}$ ), 1515.71(s),1410.03 (m),1305.76.12(s).

The synthesis of the (3-CH<sub>3</sub>)C<sub>6</sub>H<sub>3</sub>(OH) CHNCH(C<sub>6</sub>H<sub>5</sub>)<sub>2</sub> (L5) is similar to L1. L5 was got as yellow crystals. yield:1.82g(60.5%).<sup>1</sup>H NMR (CDCl<sub>3</sub>,  $\delta$ , ppm): 13.73(s, 1H, OH); 9.49(s, 1H, -C=N-H);7.12-7.40(m, 10H, 2C<sub>6</sub>H<sub>5</sub>); 6.85-7.11 (m, 3H, C<sub>6</sub>H<sub>3</sub>); 5.61 (s, 1H, C<sub>13</sub>H<sub>12</sub>);2.31 (s, 3H, CH<sub>3</sub>). FT-IR (KBr):2929.73(w), 2756.36 (w), 1924.44(w),1661.48(vs,  $\nu_{C=N}$ ), 1510.84 (s),1472.50 (m),1394.00 (w),1291.95 (m).

The synthesis of the (3-OCH<sub>3</sub>)C<sub>6</sub>H<sub>3</sub>(OH) CHNCH(C<sub>6</sub>H<sub>5</sub>)<sub>2</sub> (L6) is similar to L1. L6 was got as yellow crystals. yield:1.72 g(54.3%).<sup>1</sup>H NMR (CDCl<sub>3</sub>,  $\delta$ , ppm): 14.16(s, 1H, OH); 9.50(s, 1H, -C=N-H);7.02-7.44(m, 10H, 2C<sub>6</sub>H<sub>5</sub>); 6.78-7.02 (m, 3H, C<sub>6</sub>H<sub>3</sub>); 5.62 (s, 1H, C<sub>13</sub>H<sub>12</sub>); 3.91(s, 3H, OCH<sub>3</sub>). FT-IR (KBr): 3133.34(w), 2917.45(w), 2745.53(w), 1852.54(w),1535.73(vs,  $\nu_{C=N}$ ), 1358.61 (w),1305.80 (m).

The synthesis of the(3-Br) (5-Br)C<sub>6</sub>H<sub>2</sub>(OH) CHNCH(C<sub>6</sub>H<sub>5</sub>)<sub>2</sub> (L7) is similar to L1. L7 was got as yellow crystals. yield:2.85g(64.0%).<sup>1</sup>H NMR (CDCl<sub>3</sub>,  $\delta$ , ppm): 14.64 (s, 1H, OH); 9.32(s, 1H, -C=N-H);7.27-7.43(m, 10H, 2C<sub>6</sub>H<sub>5</sub>); 7.10-7.27 (m, 3H, C<sub>6</sub>H<sub>2</sub>); 5.69 (s, 1H, C<sub>13</sub>H<sub>12</sub>). FT-IR (KBr): 2934.87(w), 2857.52 (w), 2718.63 (w), 1917.09(w),1655.54(vs,  $\nu_{C=N}$ ), 1607.85 (w),1512.03 (m),1474.99 (w),1309.43(s).

The synthesis of the(3-Cl) (5-Cl)C<sub>6</sub>H<sub>2</sub>(OH) CHNCH(C<sub>6</sub>H<sub>5</sub>)<sub>2</sub> (L8) is similar to L1. L8

was got as yellow crystals. yield:2.17g(61.0%).<sup>1</sup>H NMR (CDCl<sub>3</sub>, δ, ppm): 14.68 (s, 1H, OH); 9.30(s, 1H, -C=N-H);7.21-7.41(m, 10H, 2C<sub>6</sub>H<sub>5</sub>); 7.08-7.21 (m, 3H, C<sub>6</sub>H<sub>2</sub>); 5.67 (s, 1H, C<sub>13</sub>H<sub>12</sub>). FT-IR (KBr): 2927.21(w), 2863.47(w), 2803.96(w), 2036.27(w),1651.19(vs, ν<sub>C=N</sub>), 1580.71(m),1512.42 (s),1397.37(w),1310.33(m).

The synthesis of the Ni{(5-CH<sub>3</sub>)C<sub>6</sub>H<sub>3</sub>(O)CHNCH(C<sub>6</sub>H<sub>5</sub>)<sub>2</sub> (Ni2) is similar to Ni1. The dark-green crystal Ni2 catalyst was crystallized from dichloromethane in 61% yield. <sup>1</sup>H NMR (CDCl<sub>3</sub>, δ, ppm): 9.41(s, 2H, 2C-N-H); 1.03-1.45(m, 20H, 4C<sub>6</sub>H<sub>5</sub>); 7.31-7.50(m, 6H, 2C<sub>6</sub>H<sub>3</sub>); 5.61 (s, 2H, 2C<sub>13</sub>H<sub>11</sub>);2.13-2.49(s, 6H, 2CH<sub>3</sub>). <sup>13</sup>C NMR (CDCl<sub>3</sub>, δ, ppm): 165.11, 142.94, 132.92, 130.91, 129.74, 127.05, 116.94, 29.57, 20.25. Analysis calculated for Ni2: C,76.34; H,6.11; N,4.34; found: C,76.32; H,6.15; N,4.29.

The synthesis of the Ni{(5-OCH<sub>3</sub>)C<sub>6</sub>H<sub>3</sub>(O)CHNCH(C<sub>6</sub>H<sub>5</sub>)<sub>2</sub> (Ni3) is similar to Ni1. The dark-green crystal Ni3 catalyst was crystallized from dichloromethane in 58% yield. <sup>1</sup>H NMR (CDCl<sub>3</sub>, δ, ppm): 9.42 (s, 2H, 2C-N-H); 0.65-1.03 (m, 20H, 4C<sub>6</sub>H<sub>5</sub>); 7.31-7.49(m, 6H, 2C<sub>6</sub>H<sub>3</sub>); 5.57 (s, 2H, 2C<sub>13</sub>H<sub>11</sub>), 3.43-3.91(s, 6H, 2OCH<sub>3</sub>). <sup>13</sup>C NMR (CDCl<sub>3</sub>, δ, ppm): 166.31, 143.87, 133.23, 131.31, 129.82, 128.02, 117.32, 56.32, 30.32. Analysis calculated for Ni3: C,72.90; H,5.83; N,3.95; found: C,72.84; H,5.75; N,3.97.

The synthesis of the Ni{(5-Br)C<sub>6</sub>H<sub>3</sub>(O)CHNCH(C<sub>6</sub>H<sub>5</sub>)<sub>2</sub> (Ni4) is similar to Ni1. The dark-green crystal Ni4 catalyst was crystallized from dichloromethane in 71% yield. <sup>1</sup>H NMR (CDCl<sub>3</sub>, δ, ppm): 9.41 (s, 2H, 2C-N-H); 1.01-1.78 (m, 20H, 4C<sub>6</sub>H<sub>5</sub>); 7.32-7.56(m, 4H, 2C<sub>6</sub>H<sub>2</sub>); 5.56 (s, 2H, 2C<sub>13</sub>H<sub>11</sub>). <sup>13</sup>C NMR (CDCl<sub>3</sub>, δ, ppm): 164.49, 147.91, 132.92, 129.48, 129.74, 127.07, 124.23, 104.16, 29.26. Analysis calculated for Ni4: C,61.08; H,4.38; N,3.47; found: C61.08; H,4.39; N,3.46.

The synthesis of the Ni{(3-CH<sub>3</sub>)C<sub>6</sub>H<sub>3</sub>(O)CHNCH(C<sub>6</sub>H<sub>5</sub>)<sub>2</sub> (Ni5) is similar to Ni1. The dark-green crystal Ni5 catalyst was crystallized from dichloromethane in 64% yield. <sup>1</sup>H NMR (CDCl<sub>3</sub>, δ, ppm): 8.98(s, 2H, 2C-N-H); 0.75-1.67(m, 20H, 4C<sub>6</sub>H<sub>5</sub>); 5.60-6.93(m, 6H, 2C<sub>6</sub>H<sub>3</sub>); 5.90(s, 2H, 2C<sub>13</sub>H<sub>11</sub>), 2.02-2.55(s, 6H, 2CH<sub>3</sub>). <sup>13</sup>C NMR (CDCl<sub>3</sub>, δ, ppm): 196.67, 159.53, 134.64, 129.53, 128.76, 127.03, 118.35, 49.41,

17.23. Analysis calculated for Ni5: C,76.34; H,6.11; N,4.14; found: C,76.34; H,6.12; N,4.11.

The synthesis of the Ni{(3-OCH<sub>3</sub>)C<sub>6</sub>H<sub>3</sub>(O)CHNCH(C<sub>6</sub>H<sub>5</sub>)<sub>2</sub>} (Ni6) is similar to Ni1. The dark-green crystal Ni6 catalyst was crystallized from dichloromethane in 69% yield. <sup>1</sup>H NMR (CDCl<sub>3</sub>, δ, ppm): 9.65 (s, 2H, 2C-N-H); 0.97-1.32 (m, 20H, 4C<sub>6</sub>H<sub>5</sub>); 7.42-7.53(m, 6H, 2C<sub>6</sub>H<sub>3</sub>); 5.72 (s, 2H, 2C<sub>13</sub>H<sub>11</sub>), 3.53-3.62 (s, 6H, 2OCH<sub>3</sub>). <sup>13</sup>C NMR (CDCl<sub>3</sub>, δ, ppm): 165.46, 155.09, 140.22, 133.23, 129.71, 127.73, 119.73, 56.71, 29.96. Analysis calculated for Ni6: C,72.90; H,5.83; N,3.95; found: C,72.92; H,5.84; N,3.91.

The synthesis of the Ni{(3-Br)(5-Br)C<sub>6</sub>H<sub>2</sub>(O)CHNCH(C<sub>6</sub>H<sub>5</sub>)<sub>2</sub>}<sub>2</sub> (Ni7) is similar to Ni1. The dark-green crystal Ni7 catalyst was crystallized from dichloromethane in 75% yield. <sup>1</sup>H NMR (CDCl<sub>3</sub>, δ, ppm): 9.33 (s, 2H, 2C-N-H); 1.35-2.41 (m, 20H, 4C<sub>6</sub>H<sub>5</sub>); 7.48-7.92(m, 4H, 2C<sub>6</sub>H<sub>2</sub>); 5.67 (s, 2H, 2C<sub>13</sub>H<sub>11</sub>). <sup>13</sup>C NMR (CDCl<sub>3</sub>, δ, ppm): 163.34, 143.21, 131.82, 129.28, 128.45, 126.37, 117.72, 113.34, 31.31. Analysis calculated for Ni7: C,51.08; H,3.45; N,2.91; found: C,51.07; H,3.47; N,2.89.

The synthesis of the Ni{(3-Cl)(5-Cl)C<sub>6</sub>H<sub>2</sub>(O)CHNCH(C<sub>6</sub>H<sub>5</sub>)<sub>2</sub>}<sub>2</sub> (Ni8) is similar to Ni1. The dark-green crystal Ni8 catalyst was crystallized from dichloromethane in 73% yield. <sup>1</sup>H NMR (CDCl<sub>3</sub>, δ, ppm): 9.39 (s, 2H, 2C-N-H); 0.51-1.02 (m, 20H, 4C<sub>6</sub>H<sub>5</sub>); 7.33-7.64(m, 4H, 2C<sub>6</sub>H<sub>2</sub>); 5.71 (s, 2H, 2C<sub>13</sub>H<sub>11</sub>). <sup>13</sup>C NMR (CDCl<sub>3</sub>, δ, ppm): 160.13, 143.18, 129.16, 128.42, 127.67, 126.07, 122.24, 120.12, 29.89. Analysis calculated for Ni8: C,62.63; H,4.23; N,3.56; found: C,62.65; H,4.25; N,3.54.

Table S1 Selected bond lengths (Å) and angles (deg) for Ni1-Ni4

| Ni1        |          | Ni2        |            | Ni3        |          | Ni4        |            |
|------------|----------|------------|------------|------------|----------|------------|------------|
| Bond       | Length   | Bond       | Length     | Bond       | Length   | Bond       | Length     |
| N(1)-Ni(1) | 1.927(4) | N(1)-Ni(1) | 1.9300(13) | N(1)-Ni(1) | 1.916(2) | N(1)-Ni(1) | 1.9261(16) |
| N(2)-Ni(1) | 1.930(4) | N(2)-Ni(1) | 1.9300(13) | N(2)-Ni(1) | 1.916(2) | N(2)-Ni(1) | 1.9261(16) |
| Ni(1)-O(2) | 1.816(4) | Ni(1)-O(2) | 1.8295(12) | Ni(1)-O(2) | 1.831(2) | Ni(1)-O(2) | 1.8480(14) |
| Ni(1)-O(1) | 1.821(4) | Ni(1)-O(1) | 1.8295(12) | Ni(1)-O(1) | 1.831(2) | Ni(1)-O(1) | 1.8480(14) |
| Bond       | Angle    | Bond       | Angle      | Bond       | Angle    | Bond       | Angle      |

|                     |            |                     |           |                     |           |                     |           |
|---------------------|------------|---------------------|-----------|---------------------|-----------|---------------------|-----------|
| O(2)-Ni(1)-<br>O(1) | 170.83(16) | O(2)-<br>Ni(1)-O(1) | 180.0     | O(2)-<br>Ni(1)-O(1) | 180.00(1) | O(2)-<br>Ni(1)-O(1) | 180.00(9) |
| O(2)-Ni(1)-<br>N(1) | 87.33(15)  | O(2)-<br>Ni(1)-N(1) | 87.69(5)  | O(2)-<br>Ni(1)-N(1) | 88.47(8)  | O(2)-<br>Ni(1)-N(1) | 88.33(7)  |
| O(1)-Ni(1)-<br>N(1) | 91.86 (15) | O(1)-<br>Ni(1)-N(1) | 92.31 (5) | O(1)-<br>Ni(1)-N(1) | 91.53 (8) | O(1)-<br>Ni(1)-N(1) | 91.67(7)  |
| O(2)-Ni(1)-<br>N(2) | 93.55 (15) | O(2)-<br>Ni(1)-N(2) | 92.32 (5) | O(2)-<br>Ni(1)-N(2) | 91.53 (8) | O(2)-<br>Ni(1)-N(2) | 91.67(7)  |
| O(1)-Ni(1)-<br>N(2) | 172.24(14) | O(1)-<br>Ni(1)-N(2) | 87.69(5)  | O(1)-<br>Ni(1)-N(2) | 88.47(8)  | O(1)-<br>Ni(1)-N(2) | 88.33(7)  |
| N(1)-Ni(1)-<br>N(2) | 130.5 (3)  | N(1)-<br>Ni(1)-N(2) | 180.0     | N(1)-<br>Ni(1)-N(2) | 180.00(1) | N(1)-<br>Ni(1)-N(2) | 180.00(8) |

Table S2 Selected bond lengths (Å) and angles (deg) for Ni5-Ni8

| Ni5                 |            | Ni6                 |            | Ni7                 |            | Ni8                 |            |
|---------------------|------------|---------------------|------------|---------------------|------------|---------------------|------------|
| Bond                | Length     | Bond                | Length     | Bond                | Length     | Bond                | Length     |
| N(1)-Ni(1)          | 1.921(7)   | N(1)-Ni(1)          | 1.919(2)   | N(1)-Ni(1)          | 1.899(3)   | N(1)-Ni(1)          | 1.931(3)   |
| N(2)-Ni(1)          | 1.921(7)   | N(2)-Ni(1)          | 1.919(2)   | N(2)-Ni(1)          | 1.899(3)   | N(2)-Ni(1)          | 1.931(3)   |
| Ni(1)-O(2)          | 1.826(8)   | Ni(1)-O(2)          | 1.8298(16) | Ni(1)-O(2)          | 1.840(2)   | Ni(1)-O(2)          | 1.846(3)   |
| Ni(1)-O(1)          | 1.826(8)   | Ni(1)-O(1)          | 1.8298(16) | Ni(1)-O(1)          | 1.840(2)   | Ni(1)-O(1)          | 1.846(3)   |
| Bond                | Angle      | Bond                | Angle      | Bond                | Angle      | Bond                | Angle      |
| O(2)-Ni(1)-<br>O(1) | 180.000(1) | O(2)-<br>Ni(1)-O(1) | 180.00(10) | O(2)-<br>Ni(1)-O(1) | 170.30(15) | O(2)-<br>Ni(1)-O(1) | 180.00(18) |
| O(2)-Ni(1)-<br>N(1) | 87.9(3)    | O(2)-<br>Ni(1)-N(1) | 87.78(7)   | O(2)-<br>Ni(1)-N(1) | 87.47(10)  | O(2)-<br>Ni(1)-N(1) | 88.31(13)  |
| O(1)-Ni(1)-<br>N(1) | 92.1(3)    | O(1)-<br>Ni(1)-N(1) | 92.22(7)   | O(1)-<br>Ni(1)-N(1) | 92.81(10)  | O(1)-<br>Ni(1)-N(1) | 91.69(13)  |
| O(2)-Ni(1)-<br>N(2) | 92.1(3)    | O(2)-<br>Ni(1)-N(2) | 92.22(7)   | O(2)-<br>Ni(1)-N(2) | 92.81(11)  | O(2)-<br>Ni(1)-N(2) | 91.69(13)  |
| O(1)-Ni(1)-<br>N(2) | 87.9(3)    | O(1)-<br>Ni(1)-N(2) | 87.78(7)   | O(1)-<br>Ni(1)-N(2) | 87.47(10)  | O(1)-<br>Ni(1)-N(2) | 88.31(13)  |

|             |            |            |       |            |            |            |
|-------------|------------|------------|-------|------------|------------|------------|
| N(2)        |            | Ni(1)-N(2) |       | Ni(1)-N(2) |            | Ni(1)-N(2) |
| N(1)-Ni(1)- |            | N(1)-      |       | N(1)-      |            | N(1)-      |
|             | 180.000(1) |            | 180.0 |            | 176.68(18) |            |
| N(2)        |            | Ni(1)-N(2) |       | Ni(1)-N(2) |            | Ni(1)-N(2) |
|             |            |            |       |            |            | 180.000(1) |
